1 **Physiological and biochemical changes associated with experimental dehydration in the**  
2 **desert adapted cactus mouse, *Peromyscus eremicus***

3

4 Lauren Kordonowy<sup>1</sup>, Kaelina Lombardo<sup>1</sup>, Hannah Green<sup>2</sup>, Evicé Bolton<sup>1</sup>, Sarah LaCourse<sup>3</sup>, Matthew  
5 MacManes<sup>1</sup>

6

7 <sup>1</sup> University of New Hampshire, Department of Molecular Cellular and Biomedical Sciences

8 <sup>2</sup> University of New Hampshire, Department of Biological Sciences

9 <sup>3</sup> University of New Hampshire, Department of Psychology

10

11

12 **Abstract**

13 Characterizing traits critical for adaptation to a given environment is an important first step in

14 understanding how phenotypes evolve. How animals adapt to the extreme heat and aridity

15 commonplace to deserts represents is an exceptionally interesting example of these processes, and has

16 been the focus of study for decades. In contrast to those studies, where experiments are conducted on

17 either wild animals or captive animals held in non-desert conditions, the study described here leverages

18 a unique environmental chamber that replicates desert conditions for captive *Peromyscus eremicus*

19 (cactus mouse). Here we establish baseline values for daily water intake and for serum electrolytes, as

20 well as the response of these variables to experimental dehydration. In brief, *P. eremicus*' daily water

21 intake is very low. It's serum electrolytes are distinct from many previously studied animals, and its

22 response to dehydration is profound, though not suggestive of renal impairment in the face of profound

23 dehydration, which is atypical of mammals.

24

25

26 **Introduction**

27 Understanding the evolution of adaptive traits has long been one of the primary goals in evolutionary  
28 biology. The study of the relationships between fitness and phenotype, often powered by modern  
29 genomic techniques (Vignieri et al. 2010), has provided researchers with insight into the mechanistic  
30 processes that underlie adaptive phenotypes (Castoe et al. 2013; Huerta-Sánchez et al. 2014). Systems  
31 in which the power of genomics can be combined with an understanding of natural history and  
32 physiology are well suited for the study of adaptation (Mullen et al. 2009; Bedford and Hoekstra 2015)  
33 especially when researchers have the ability to assay the link between genotype and phenotype in wild  
34 animals and then conduct complementary experiments using representative animals in carefully  
35 controlled laboratory environments. The study described here, characterizing the physiology and serum  
36 biochemistry of *Peromyscus eremicus* is the first step in a larger study aimed at understanding the  
37 genomics architecture of adaptation to desert environments.

38  
39 Desert adaptation has significant ecological, evolutionary, and biomedical significance. In contrast to  
40 humans and other mammals, desert rodents can survive in extreme environmental conditions and are  
41 resistant to the effects of dehydration. Physiological adaptations to deserts have been characterized in  
42 several rodents. Specifically, renal histology has been studied in multiple Heteromyid rodents (Altschuler  
43 et al. 1979), and the general conclusion is that these desert adapted animals have evolved elongate  
44 Loops of Henle (Barrett et al. 1978; Mbassa 1988; Beuchat 1996) that are hypothesized to optimize  
45 water conservation. In addition to studies of renal histology, several studies have characterized  
46 pulmonary water loss (Schmidt-Nielsen and Schmidt-Nielsen 1950; Hayes et al. 1998), water metabolism  
47 (Howell and Gersh 1935), and water consumption (MacMillen and Lee 1967; Bradford 1974; Mares  
48 1977; Nagy 1988; Merkt and Taylor 1994) in desert rodents. While desert animals possess specialized  
49 physiology that is efficient with regards to water metabolism and loss, whether or not specialized

50 genomic adaptation exists is an active area of research (Marra et al. 2012; MacManes and Eisen 2014;  
51 Marra et al. 2014) .

52

53 Although the cactus mouse (*Peromyscus eremicus*) has not been a particular focus for the study of  
54 desert adaptation (but see (al-Kahtani et al. 2004; MacManes and Eisen 2014), this Cricetid rodent  
55 native to the arid regions of the Southwestern United States and Northern Mexico (Veal and Caire 2001)  
56 offers a unique opportunity to understand physiological adaptations to deserts. *P. eremicus* is a  
57 member of a larger genus of animals known colloquially as the “*Drosophila* of mammals” (Bedford and  
58 Hoekstra 2015), and *Peromyscus* species have been the focus of extensive study (Hoekstra et al. 2001;  
59 Steiner et al. 2007; MacManes and Lacey 2012; Shorter et al. 2012). *P. eremicus* is a sister species to the  
60 non-desert adapted *P. californicus* (Bradley et al. 2007), and it is closely related to *P. crinitus*, the canyon  
61 mouse, which is another desert adapted rodent native to Southwestern deserts.

62

63 Critical to desert survival is the ability to maintain water balance even when the loss of water exceeds  
64 dietary water intake (Heimeier et al. 2002). Indeed, the mammalian corpus consists of 60% water  
65 (Jéquier and Constant 2009). Far from a static reservoir, proper physiologic function requires water for  
66 numerous processes, including nutrient transport (Haussinger 1996), signal transduction, pH balance,  
67 thermal regulation (Montain et al. 1999) and the removal of metabolic waste. To accomplish these  
68 functions, a nearly constant supply of water is required to replace water loss (Jéquier and Constant  
69 2009), which occurs mainly via the gastrointestinal and genitourinary systems, and evaporative loss,  
70 which is greatly accelerated in extreme heat and aridity (Cheuvront et al. 2010). Because the body  
71 possesses limited reserves, when loss exceeds intake during even a short period of time, dehydration  
72 and death can occur. Mammals are exquisitely sensitive to dehydration and possess limited  
73 compensatory mechanisms.

74

75 Characterizing desert adaptation requires careful and integrative physiological studies, which should  
76 include a detailed characterization of water intake, responses to dehydration, and the measurement of  
77 blood electrolytes. Indeed, quantifying these metrics is one of the first steps in understanding how  
78 animals survive in the extreme heat and aridity of deserts. In particular, the electrolytes chloride and  
79 sodium are important markers of dehydration (Costill et al. 1976). These molecules play essential roles  
80 in metabolic and physiological processes, and they are integral to the functionality of a variety of  
81 transmembrane transport pumps (Blaustein and Lederer 1999; Jentsch et al. 2002), neurotransmission  
82 (Yu and Catterall 2003), and maintenance of tonicity (Feig and McCurdy 1977). Furthermore,  
83 hypernatremia causes restlessness, lethargy, muscle weakness, or coma (Adrogué and Madias 2000).  
84 Bicarbonate ion, in contrast, is primarily responsible for aiding in the maintenance of the acid-base  
85 balance and is resorbed in the renal tubules (McKinney and Burg 1977). Blood urea nitrogen (BUN) is a  
86 test that assays the abundance of urea – the end product for metabolism of nitrogen containing  
87 compounds. Urea is resorbed in the glomerulus, and renal impairment is often inferred when BUN  
88 becomes elevated (Baum et al. 1975). Importantly, the canonical model of urea resorption is dependent  
89 on urine volume, which is markedly diminished in desert rodents, thus limiting the utility of using BUN  
90 as an indicator of renal function. Lastly, creatinine, a product of muscle breakdown, whose measured  
91 level does not depend on urine volume is used as a measure of renal function (Baum et al. 1975).

92

93 Genes most frequently implicated in desert-adaptation include members of the aquaporin family (Huang  
94 et al. 2001). However, previous work suggests that an alternative gene family, the solute carriers, are  
95 more relevant for desert-adaptation in the cactus mouse (MacManes and Eisen 2014). As a first step  
96 towards fully elucidating the patterns of adaptive evolution to deserts in *P. eremicus*, we characterized  
97 the normal patterns of water intake and electrolyte levels as well as the physiologic response to

98 experimental dehydration. As such, this study provides critical physiological and biochemical  
99 information about *P. eremicus* and its response to dehydration and is generally useful as researchers  
100 begin to leverage large-scale genome data against classic questions regarding the evolution of adaptive  
101 phenotypes.

102

### 103 **Materials and Methods**

104 We used captive *P. eremicus* that were purchased from the University of South Carolina Peromyscus  
105 Genetic Stock Center in 2013. These animals, which are descendant from wild caught animals from a  
106 dry-desert population in Arizona, have been bred in captivity at the University of New Hampshire.  
107 Animals are housed in a large walk-in environmental chamber built to replicate the environmental  
108 conditions in which this population has evolved. Specifically, the animals experience a normal diurnal  
109 pattern of temperature fluctuation, ranging from 90F during the daytime to 75F during the night.  
110 Relative humidity (RH) ranges from 10% during the day to 25% during the night. Animals are housed in  
111 standard lab mouse cages with bedding that has been dehydrated to match desert conditions. They are  
112 fed a standard rodent chow, which has also been dehydrated. Water is provided *ad lib* during certain  
113 phases of experimentation and withheld completely during others. All animal care procedures follow  
114 the guidelines established by the American Society of Mammalogy (Sikes et al. 2011) and have been  
115 approved by the University of New Hampshire Animal Care and Use Committee under protocol number  
116 103092.

117

118 All animals included in this study were sexually mature adults. A slight bias for the inclusion of males  
119 exists, as a concurrent study of male reproductive genomics was occurring. Preliminary analyses  
120 conducted suggest that no significant differences in any of the physiological measures, and as a result,  
121 males and females were analyzed as one group. For a subset of animals, water intake was measured,

122 which was accomplished via the use of customized 15ml conical tubes, wherein water intake was  
123 measured every 24 hours for a minimum of 3 consecutive days (range 3-10 days). Animals selected for  
124 the dehydration trial were weighed on a digital scale, housed without water for three days, then re-  
125 weighed to determine the change in body mass due to dehydration. At the conclusion of water  
126 measurement or after a three-day dehydration animals were sacrificed via isoflurane overdose and  
127 decapitation. Immediately after death, a 120uL sample of trunk blood was obtained for serum  
128 electrolyte measurement. This was accomplished using an Abaxis Vetscan VS2 machine with a critical  
129 care cartridge, which measures the concentration of several electrolytes (Sodium, Chloride, Bicarbonate  
130 ion, Creatinine, and Blood Urea Nitrogen (BUN)) relevant to hydration status and renal function. Lastly,  
131 the kidney, spleen, liver, lung, hypothalamus, testes, vas deferens and epididymis were dissected out  
132 and stored in RNAlater (Ambion Inc.) for future study. All statistical analyses were carried out in the  
133 statistical package, R (R Core Development Team 2011).

134

## 135 **Results**

136 We measured the daily water intake for 22 adult cactus mice for between three and 10 consecutive  
137 days. Mean water intake was 0.11 mL per day per gram body weight (median=0.11, SD= 0.05, min=  
138 0.033, max=0.23). We measured levels of serum Sodium, Chloride, Bicarbonate ion, Creatinine, and  
139 Blood Urea Nitrogen (BUN) for 44 adult mice, thereby establishing normal (baseline) values for *P.*  
140 *eremicus* (Figure 1 and Table 1).

141

142 A comparison of mice provided with water *ad libitum* to mice that exposed to experimental water  
143 deprivation for three days revealed that the dehydrated mice lost an average of 23.2% of their body  
144 weight (median=23.9%, SD=5.3%, min=12.3%, max=32.3%). Despite this substantial weight loss,  
145 anecdotally, mice appeared healthy. They were active, eating, and interacting normally. The amount of

146 weight loss did not depend on daily water intake ( $p=0.63$ ,  $R^2= 0.03$ ), though the trend suggests that  
147 animals that drink more water lost more weight). Furthermore, body weight did not strongly influence  
148 the percent loss of body weight (Figure 2;  $p=0.68$ ,  $R^2= 0.02$ ).

149

150 In addition to a substantial loss in body weight, dehydration was associated with differences in serum  
151 electrolytes (Figure 3;  $n=19$  dehydrated,  $n=24$  hydrated). These changes were subtle, but significant  
152 using a two-sample t-test ( $p < 0.008$  in all cases).

153

154 Lastly, the levels of serum electrolytes were tightly correlated with percent body weight loss (Figure 4).

155 Indeed, the relationship between the level of serum sodium and weight loss was positive and significant,

156 (ANOVA, F-statistic: 12.85, 11 DF,  $p= 0.004$ ), as was the relationship between BUN and weight loss

157 (ANOVA, F-statistic: 9.089, 11 DF,  $p= 0.012$ ). The relationships between weight loss and chloride and

158 bicarbonate levels respectively, were positive but not significant.

159

## 160 **Discussion**

161 Deserts are amongst the harshest environments on the planet. Indeed, animals living in these areas

162 must be highly adapted to the unique combination of extreme heat and aridity. Given that our

163 understanding of the physiology of desert adapted animals is limited largely to studies in renal histology

164 (Mbassa 1988) and on water intake and output (MacMillen and Lee 1967; Tracy and Walsberg 2001), an

165 enhanced understanding of serum electrolyte changes due to dehydration is informative. Because many

166 of the harmful effects of dehydration result from electrolyte abnormalities, characterizing normal values

167 and the electrolyte response to dehydration represents a critical first step in garnering a deeper

168 understanding of how desert animals survive despite severe and prolonged dehydration.

169

170 In this study, normal (baseline) values for serum Sodium, Chloride, Bicarbonate Ion, Creatinine, and  
171 Blood Urea Nitrogen were established in a captive colony of lab animals housed in desert conditions.  
172 Although these measures may differ in wild animals (see (Calisi and Bentley 2009) for a brief review of  
173 such differences), establishing normal values in captive animals is crucial, though future studies aim to  
174 understand the patterns of electrolyte variation in wild animals. In *P. eremicus*, we define the normal  
175 ranges for each electrolyte as those values falling between the 1<sup>st</sup> and 3<sup>rd</sup> quartile. Serum Chloride and  
176 Sodium were significantly higher than in published ranges for other mammals, including humans, a  
177 marsupial (Viggers and Lindenmayer 1996), *Cricetomys* (Nssien et al. 2002), and the porcupine (Moreau  
178 et al. 2003). However, serum chloride and sodium levels in our study were quite comparable to another  
179 wild rodent, *Neotima fuscipes* (Weber et al. 2002), a Mustelid (Thornton et al. 1979), and the Hyrax  
180 (Aroch et al. 2007). Values for BUN are generally higher in this study; unfortunately, a direct comparison  
181 is not possible, as measured values are dependent on the volume of urine produced. Serum Creatinine is  
182 low, largely resulting from the general lack of muscle mass in *P. eremicus* relative to other mammals.  
183 However, because the equipment used to analyze this electrolyte does not effectively capture the lower  
184 end of the biological range, direct comparisons are not made for this metric.

185

186 In addition to characterizing baseline electrolytes and their response to experimental dehydration, the  
187 normative value for daily water intake was estimated to be 0.11 mL per day per gram body weight.  
188 Though comparable measures of water consumption are scarce, one study in two arid adapted *Limnys*  
189 (*L. pictus* and *L. irroratus*) housed in non-desert captive settings were estimated to be 0.18 and 0.17 mL  
190 per day per gram body weight respectively (Christian et al. 1978) – a value much greater than in *P.*  
191 *eremicus*.

192



193 Animals that were exposed to experimental dehydration lost a substantial amount of body weight.  
194 Dehydration in humans, resulting in loss of even a fraction of this amount results in cardiovascular  
195 collapse and death. Indeed, even a dehydration-related loss of a few percent of body weight may cause  
196 serious renal impairment or renal failure. That the cactus mouse may lose so much weight as a result of  
197 dehydration and remain active, and apparently healthy, without renal impairment is a testament to  
198 their desert adaptation. Yet, while anecdotally mice appear well, they may be experiencing substantial  
199 cognitive impairment, as is the case with mild-human dehydration (Armstrong et al. 2012). Future  
200 studies in the lab aim to understand the cognitive effects of dehydration in cactus mouse.

201  
202 In addition to weight loss, dehydrated animals demonstrated biochemical evidence of physiological  
203 stress, in the form of increased Sodium, Chloride, BUN, and Bicarb. There were no significant  
204 relationships between any physiological value and Creatinine, suggesting that dehydration related stress  
205 does not result in renal impairment or damage. Indeed, this is in contrast to humans and other  
206 mammals where acute dehydration of the nature imposed on these animals is universally related to  
207 renal failure and subsequent death. That *P. eremicus* can withstand this level of dehydration is a  
208 testament to the processes involved in adaptation. Studies in progress aim to link patterns of  
209 physiological change of the types described here to patterns of gene expression in both captive and wild  
210 animals, further informing our understanding of renal failure due to dehydration in mammals.

211

212

213

214

215

216

- 217 ADROGUÉ, H. J. AND N. E. MADIAS. 2000. Hypernatremia. *New England Journal Of Medicine* 342:1493–1499.
- 218 AL-KAHTANI, M. A., C. ZULETA, E. CAVIEDES-VIDAL AND T. GARLAND. 2004. Kidney mass and relative medullary  
219 thickness of rodents in relation to habitat, body size, and phylogeny. *Physiological and Biochemical*  
220 *Zoology* 77:346–365.
- 221 ARMSTRONG, L. E. ET AL. 2012. Mild dehydration affects mood in healthy young women. *Journal of*  
222 *Nutrition* 142:382–388.
- 223 AROCH, I., R. KING AND G. BANETH. 2007. Hematology and serum biochemistry values of trapped, healthy,  
224 free-ranging rock hyraxes (*Procavia capensis*) and their association with age, sex, and gestational  
225 status. *Veterinary clinical pathology / American Society for Veterinary Clinical Pathology* 36:40–48.
- 226 BARRETT, J. M., W. KRIZ, B. KAISLING AND C. DE ROUFFIGNAC. 1978. The ultrastructure of the nephrons of the  
227 desert rodent (*Psammomys obesus*) kidney. II. Thin limbs of Henle of long-looped nephrons. *The*  
228 *American journal of anatomy* 151:499–514.
- 229 BAUM, N., C. C. DICHOSO AND C. E. CARLTON. 1975. Blood urea nitrogen and serum creatinine. *Physiology*  
230 *and interpretations. Urology* 5:583–588.
- 231 BEDFORD, N. L. AND H. E. HOEKSTRA. 2015. *Peromyscus* mice as a model for studying natural variation. *eLife*  
232 4:e06813.
- 233 BEUCHAT, C. A. 1996. Structure and concentrating ability of the mammalian kidney: correlations with  
234 habitat. *American Journal Of Physiology* 271:R157–79.
- 235 BLAUSTEIN, M. P. AND W. J. LEDERER. 1999. Sodium/calcium exchange: its physiological implications.  
236 *Physiological reviews* 79:763–854.
- 237 BRADFORD, D. F. 1974. Water stress of free-living *Peromyscus truei*. *Ecology* 55:1407–1414.
- 238 BRADLEY, R. D., N. D. DURISH, D. S. ROGERS, J. R. MILLER, M. D. ENGSTROM AND C. W. KILPATRICK. 2007. Toward a  
239 molecular phylogeny for *Peromyscus*: Evidence from mitochondrial cytochrome-b sequences.  
240 *Journal Of Mammalogy* 88:1146–1159.
- 241 CALISI, R. M. AND G. E. BENTLEY. 2009. Lab and field experiments: Are they the same animal? *Hormones*  
242 *And Behavior* 56:1–10.
- 243 CASTOE, T. A. ET AL. 2013. The Burmese python genome reveals the molecular basis for extreme  
244 adaptation in snakes. *PNAS* 110:20645–20650.
- 245 CHEUVRONT, S. N., R. W. KENEFICK, S. J. MONTAIN AND M. N. SAWKA. 2010. Mechanisms of aerobic  
246 performance impairment with heat stress and dehydration. *Journal of Applied Physiology*  
247 109:1989–1995.
- 248 CHRISTIAN, D. P., J. O. MATSON AND S. G. ROSENBERG. 1978. Comparative water balance in two species of  
249 *Liomys*. *Comparative Biochemistry and Physiology* 61A:589–559.
- 250 COSTILL, D. L., R. COTÉ AND W. FINK. 1976. Muscle water and electrolytes following varied levels of

- 251           dehydration in man. *Journal of Applied Physiology* 40:6–11.
- 252   E. M. ALTSCHULER, R. B. NAGLE, E. J. BRAUN, S. L. LINDSTEDT AND P. H. KRUTZSCH. 1979. Morphological study of  
253   the desert heteromyid kidney with emphasis on the genus *Perognathus*. *The Anatomical Record*  
254   194:461–468.
- 255   FEIG, P. U. AND D. K. MCCURDY. 1977. The hypertonic state. *The New England journal of medicine*  
256   297:1444–1454.
- 257   HAUSSINGER, D. 1996. The role of cellular hydration in the regulation of cell function. *The Biochemical*  
258   *Journal* 313 ( Pt 3):697–710.
- 259   HAYES, J., C. BIBLE AND J. BOONE. 1998. Repeatability of mammalian physiology: Evaporative water loss and  
260   oxygen consumption of *Dipodomys merriami*. *Journal Of Mammalogy* 79:475–485.
- 261   HEIMEIER, R. A., B. J. DAVIS AND J. A. DONALD. 2002. The effect of water deprivation on the expression of  
262   atrial natriuretic peptide and its receptors in the spinifex hopping mouse, *Notomys alexis*.  
263   *Comparative Biochemistry and Physiology Part A: Physiology* 132:893–903.
- 264   HOEKSTRA, H. ET AL. 2001. Strength and tempo of directional selection in the wild. *Proceedings Of The*  
265   *National Academy Of Sciences Of The United States Of America* 98:9157–9160.
- 266   HOWELL, A. B. AND I. GERSH. 1935. Conservation of water by the rodent *Dipodomys*. *Journal Of*  
267   *Mammalogy* 16:1.
- 268   HUANG, Y. ET AL. 2001. Absence of aquaporin-4 water channels from kidneys of the desert rodent  
269   *Dipodomys merriami merriami*. *American Journal Of Physiology-Renal Physiology* 280:F794–F802.
- 270   HUERTA-SÁNCHEZ, E. ET AL. 2014. Altitude adaptation in Tibetans caused by introgression of Denisovan-like  
271   DNA. *Nature* 512:194–197.
- 272   J. R. MERKT AND C. R. TAYLOR. 1994. “Metabolic switch” for desert survival. *Proceedings Of The National*  
273   *Academy Of Sciences Of The United States Of America* 91:12313–12316.
- 274   JENTSCH, T. J., V. STEIN, F. WEINREICH AND A. A. ZDEBIK. 2002. Molecular Structure and Physiological Function  
275   of Chloride Channels. *Physiological reviews* 82:503–568.
- 276   JÉQUIER, E. AND F. CONSTANT. 2009. Water as an essential nutrient: the physiological basis of hydration.  
277   *European Journal of Clinical Nutrition* 64:115–123.
- 278   MACMANES, M. D. AND E. A. LACEY. 2012. Is promiscuity associated with enhanced selection on MHC-DQ $\alpha$   
279   in mice (genus *Peromyscus*)? *PloS one* 7:e37562.
- 280   MACMANES, M. D. AND M. B. EISEN. 2014. Characterization of the transcriptome, nucleotide sequence  
281   polymorphism, and natural selection in the desert adapted mouse *Peromyscus eremicus*. *PeerJ*  
282   2:e642.
- 283   MACMILLEN, R. E. AND A. K. LEE. 1967. Australian desert mice: independence of exogenous water. *Science*  
284   158:383–385.

- 285 MARES, M. 1977. Water Economy and Salt Balance in a South-American Desert Rodent, *Eligmodontia-*  
286 *Typus*. *Comparative Biochemistry And Physiology A-Molecular & Integrative Physiology* 56:325–332.
- 287 MARRA, N. J., A. ROMERO AND A. DEWOODY. 2014. Natural selection and the genetic basis of  
288 osmoregulation in heteromyid rodents as revealed by RNA-seq. *Molecular Ecology* 23:2699–2711.
- 289 MARRA, N. J., S. H. EO, M. C. HALE, P. M. WASER AND A. DEWOODY. 2012. A priori and a posteriori approaches  
290 for finding genes of evolutionary interest in non-model species: Osmoregulatory genes in the kidney  
291 transcriptome of the desert rodent *Dipodomys spectabilis* (Banner-Tailed Kangaroo Rat).  
292 *Comparative Biochemistry and Physiology - Part D: Genomics and Proteomics*:1–12.
- 293 MBASSA, G. K. 1988. Mammalian renal modifications in dry environments. *Veterinary research*  
294 *communications* 12:1–18.
- 295 MCKINNEY, T. D. AND M. B. BURG. 1977. Bicarbonate and fluid absorption by renal proximal straight  
296 tubules. *Kidney International* 12:1–8.
- 297 MONTAIN, S., W. LATZKA AND N. SAWKA. 1999. Fluid replacement recommendations for training in hot  
298 weather. *Military medicine* 164:502–508.
- 299 MOREAU, B., J. C. VIÉ, P. COTELLON, I. D. THOISY, A. MOTARD AND C. P. RACCURT. 2003. Hematologic and serum  
300 biochemistry values in two species of free-ranging porcupines (*Coendou prehensilis*, *Coendou*  
301 *melanurus*) in french guiana. *Journal of zoo and wildlife medicine : official publication of the*  
302 *American Association of Zoo Veterinarians* 34:159–162.
- 303 MULLEN, L. M., S. N. VIGNIERI, J. A. GORE AND H. E. HOEKSTRA. 2009. Adaptive basis of geographic variation:  
304 genetic, phenotypic and environmental differences among beach mouse populations. *Proceedings*  
305 *of the Royal Society B* 276:3809–3818.
- 306 NAGY, K. A. 1988. Seasonal patterns of water and energy balance in desert vertebrates. *Journal Of Arid*  
307 *Environments* 14:201–210.
- 308 NSSIEN, M., F. O. OLAYEMI, S. K. ONWUKA AND A. OLUSOLA. 2002. Comparison of some plasma biochemical  
309 parameters in two generations of african giant rat (*Cricetomys gambianus*, waterhouse). *African*  
310 *Journal of Biomedical Research* 5.
- 311 R CORE DEVELOPMENT TEAM, F. 2011. R: A Language and Environment for Statistical Computing. R  
312 Development Core Team, Vienna, Austria. <<http://www.R-project.org>>.
- 313 R. S. SIKES, W. L. GANNON ANIMAL CARE AND USE COMMITTEE OF THE AMERICAN SOCIETY OF MAMMALOGISTS. 2011.  
314 Guidelines of the American Society of Mammalogists for the use of wild mammals in research.  
315 *Journal Of Mammalogy* 92:235–253.
- 316 SCHMIDT-NIELSEN, B. AND K. SCHMIDT-NIELSEN. 1950. Pulmonary Water Loss in Desert Rodents. *American*  
317 *Journal Of Physiology* 162:31–36.
- 318 SHORTER, K. R., J. P. CROSSLAND, D. WEBB, G. SZALAI, M. R. FELDER AND P. B. VRANA. 2012. *Peromyscus* as a  
319 Mammalian Epigenetic Model. *Genetics Research International* 2012:1–11.

- 320 STEINER, C. C., J. N. WEBER AND H. E. HOEKSTRA. 2007. Adaptive variation in beach mice produced by two  
321 interacting pigmentation genes. *PLoS Biology* 5:e219.
- 322 THORNTON, P. C., P. A. WRIGHT, P. J. SACRA AND T. E. GOODIER. 1979. The ferret, *Mustela putorius furo*, as a  
323 new species in toxicology. *Laboratory animals* 13:119–124.
- 324 TRACY, R. AND G. WALSBERG. 2001. Intraspecific variation in water loss in a desert rodent, *Dipodomys*  
325 *merriami*. *Ecology* 82:1130–1137.
- 326 VEAL, R. AND W. CAIRE. 2001. *Peromyscus eremicus*. *Mammalian Species* 118:1–6.
- 327 VIGGERS, K. L. AND D. B. LINDENMAYER. 1996. Variation in Hematological and Serum Biochemical Values of  
328 the Mountain Brushtail Possum, *Trichosurus caninus* Ogilby (Marsupialia: Phalangeridae). *Journal Of*  
329 *Wildlife Diseases* 32:142–146.
- 330 VIGNIERI, S. N., J. G. LARSON AND H. E. HOEKSTRA. 2010. The selective advantage of crypsis in mice. *Evolution*  
331 64:2153–2158.
- 332 WEBER, D. K., K. DANIELSON, S. WRIGHT AND J. E. FOLEY. 2002. Hematology and serum biochemistry values of  
333 dusky-footed wood rat (*Neotoma fuscipes*). *Journal Of Wildlife Diseases* 38:576–582.
- 334 YU, F. H. AND W. A. CATTERALL. 2003. Overview of the voltage-gated sodium channel family. *Genome*  
335 *Biology* 4:207.
- 336
- 337
- 338
- 339
- 340
- 341
- 342
- 343
- 344

345 Table 1

346

|                    | Normal   | Min  | Max | Mean |
|--------------------|----------|------|-----|------|
| Sodium (mMol/L)    | 148-158  | 144  | 170 | 153  |
| Chloride (mMol/L)  | 110-115  | 105  | 126 | 113  |
| BUN (mg/dL)        | 29-46    | 22   | 64  | 37   |
| Bicarb (mMol/L)    | 19-25    | 15   | 26  | 22   |
| Creatinine (mg/dL) | >0.2-0.3 | >0.2 | 0.4 | 0.22 |

347

348 **Table 1.** Normal values for serum electrolytes. Normal values are defined as those values falling  
349 between the 1<sup>st</sup> and 3<sup>rd</sup> quartile. Of note, the Abaxis VS2 electrolyte analyzer does not measure  
350 Creatinine below 0.2 mg/dL; therefore, the range for normal Creatinine is truncated at this value.

351

352

353

354

355

356

357 **Figure 1.** Normal values for serum electrolytes. Human normal values (from Medline) are plotted for  
358 comparison in dotted red lines. Of note, the Abaxis VS2 electrolyte analyzer does not measure  
359 Creatinine below 0.2 mg/dL, and therefore the range for normal Creatinine is truncated at this value.  
360

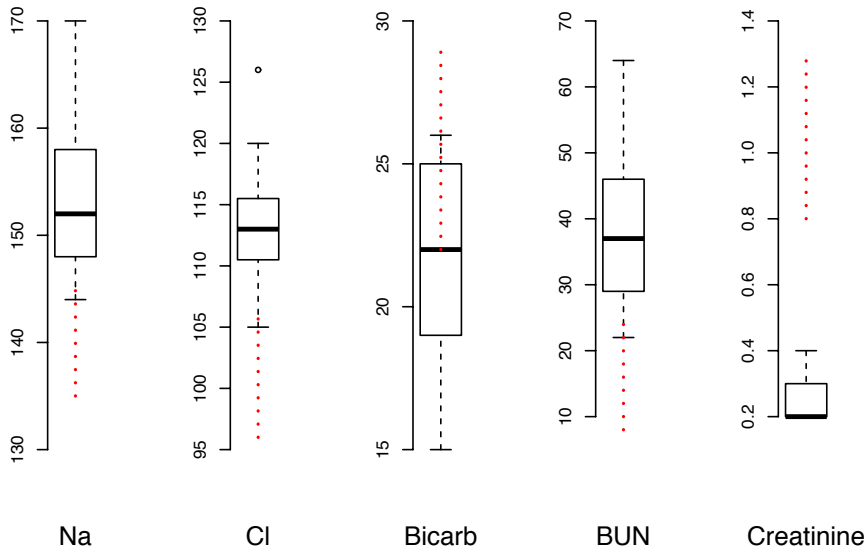

361

362

363

364

365

366

367

368

369 **Figure 2.** Percent body weight loss as a function of initial body weight due to experimental dehydration.

370 No significant trend exists.

371

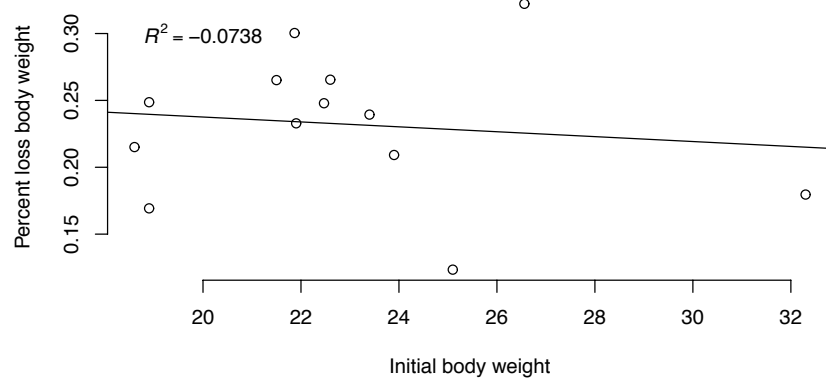

372

373

374

375

376

377

378

379

380

381



382 **Figure 3.** Experimental dehydration resulted in increases in serum sodium, chloride, BUN and  
383 bicarbonate ion. Reported p-values are from a two-tailed t-test (n=19 dehydrated: DRY, n=24 hydrated):  
384 WET.

385

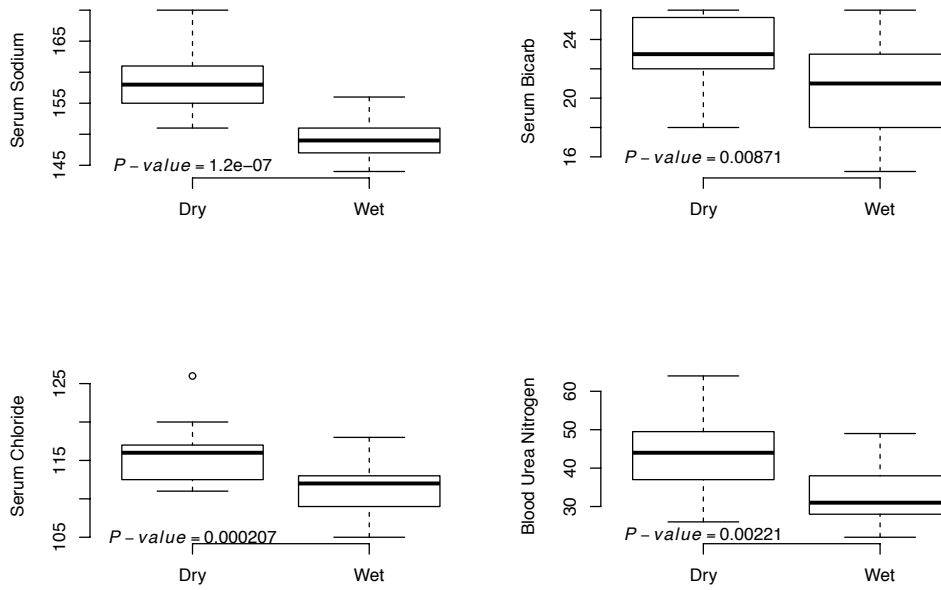

386

387

388

389

390

391

392

393 **Figure 4.** The relationship between serum electrolytes is positive in all cases and significant for Sodium  
394 (F-statistic: 12.85, 11 DF, p-value: 0.004283) and BUN (F-statistic: 9.089, 11 DF, p-value: 0.01177)

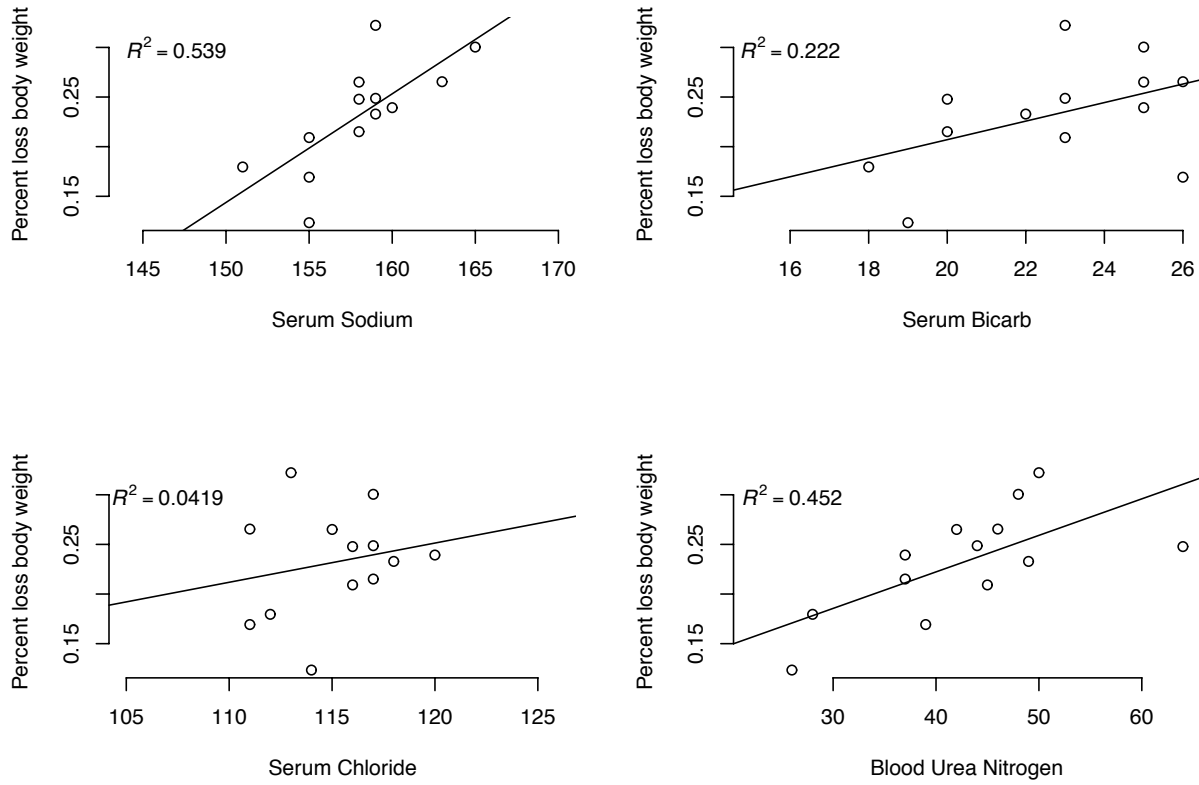

395

396
